# Supplementary material for: Potential Mechanisms of Triptolide against Diabetic Cardiomyopathy Based on Network Pharmacology Analysis and Molecular Docking
Source: Hindawi journal article supplement (doi:10.1155/2021/9944589), 2021-12-07
Supplement: f1 [file 9944589.f1.pdf]

| Protein                                                       | ID      |
|---------------------------------------------------------------|---------|
| Transcription factor p65                                      | RELA    |
| Signal transducer and activator of transcription 3            | STAT3   |
| Vascular endothelial growth factor A                          | VEGFA   |
| Apoptosis regulator Bcl-2                                     | BCL2    |
| Proto-oncogene c-Fos                                          | FOS     |
| Cyclin-dependent kinase inhibitor 1                           | CDKN1C  |
| Urokinase-type plasminogen activator                          | PLAU    |
| Tumor necrosis factor                                         | TNF     |
| Transcription factor AP-1                                     | JUN     |
| Caspase-3                                                     | CASP3   |
| Cellular tumor antigen p53                                    | TP53    |
| Mitogen-activated protein kinase 8                            | MAPK8   |
| Prostaglandin G/H synthase 2                                  | PTGS2   |
| Signal transducer and activator of transcription 1-alpha/beta | STAT1   |
| Interleukin-8                                                 | IL8     |
| Induced myeloid leukemia cell differentiation protein Mcl-1   | MCL1    |
| Transforming growth factor beta-1                             | TGFB1   |
| Interleukin-2                                                 | IL2     |
| Interferon gamma                                              | IFNG    |
| Interleukin-4                                                 | IL4     |
| Baculoviral IAP repeat-containing protein 4                   | BIRC4   |
| Beta-defensin 2                                               | BEFB2   |
| T-lymphocyte activation antigen CD80                          | CD80    |
| T-lymphocyte activation antigen CD86                          | CD86    |
| C-X-C chemokine receptor type 4                               | CXCR4   |
| Baculoviral IAP repeat-containing protein 3                   | BIRC3   |
| Programmed cell death 1 ligand 1                              | PDCD1L1 |
| Interleukin-23 subunit alpha                                  | IL23A   |
| C-C chemokine receptor type 7                                 | CCR7    |
| T-cell surface glycoprotein CD1a                              | CD1A    |
