# Supplementary material for: Potential Mechanisms of Triptolide against Diabetic Cardiomyopathy Based on Network Pharmacology Analysis and Molecular Docking
Source: Hindawi journal article supplement (doi:10.1155/2021/9944589), 2021-12-07
Supplement: f2 [file 9944589.f2.pdf]

**The common targets related to DCM were identified in the CTD and GeneCards database**

TGFB1  
SOD2  
AGT  
IL6  
PPARG  
VEGFA  
TNF  
ICAM1  
NOS3  
INSR  
AKT1  
MYH7  
IL1B  
FOS  
IL10  
CCL2  
CAT  
FN1  
STAT3  
NPPA  
INS  
SLC2A2  
CPT1A  
SDHA  
EDN1  
IGF1  
ADIPOQ  
NPPB  
SLC2A4  
TP53  
AGTR1  
ACE  
CRP
